# Supplementary material
Source: PubMed Central journal article supplement (PMC6358004)
Supplement: NIHMS81364-supplement-Supp_Table_1.pdf [file NIHMS81364-supplement-Supp_Table_1.pdf]

**Supplementary Table 1:** Default parameters for compartmental models, unless stated otherwise

| <i>Parameter</i>                                   | <i>Compartments</i> | <i>Value</i> |
|----------------------------------------------------|---------------------|--------------|
| $C_m$ ( $\mu\text{F cm}^{-2}$ )                    | All                 | 1.000e+00    |
| $R_m$ ( $\Omega \text{cm}^2$ )                     |                     | 2.201e+04    |
| $R_a$ ( $\Omega \text{cm}$ )                       |                     | 1.664e+02    |
| $E_h$ (mV)                                         |                     | -2.000e+01   |
| $E_{\text{leak}}$ (mV)                             |                     | -7.357e+01   |
| $E_{\text{GABA}}$ (mV)                             |                     | -7.000e+01   |
| $E_{\text{AMPA}}$ (mV)                             |                     | 0.000e+00    |
| $E_{\text{NMDA}}$ (mV)                             |                     | 5.000e+00    |
| $E_{\text{Na}}$ (mV)                               |                     | 6.000e+01    |
| $E_{\text{K}}$ (mV)                                |                     | -8.500e+01   |
| $\bar{g}_{\text{Na}}$ ( $\text{mS cm}^{-2}$ )      |                     | Axon         |
|                                                    | Soma                | 5.686e+01    |
|                                                    | Distal dendrites    | 9.842e-04    |
| $\bar{g}_{\text{K, dR}}$ ( $\text{mS cm}^{-2}$ )   | Axon                | 1.045e+00    |
|                                                    | Soma & dendrites    | 4.461e-03    |
| $\bar{g}_{\text{K, A}}$ ( $\text{mS cm}^{-2}$ )    | Axon                | 2.982e+02    |
|                                                    | Soma & dendrites    | 2.235e+02    |
| $\bar{g}_{\text{K, M}}$ ( $\text{mS cm}^{-2}$ )    | Axon                | 4.243e+00    |
|                                                    | Soma & dendrites    | 3.320e-01    |
| $\bar{g}_{\text{h, fast}}$ ( $\text{mS cm}^{-2}$ ) | All                 | 9.800e-02    |
| $\bar{g}_{\text{h, slow}}$ ( $\text{mS cm}^{-2}$ ) |                     | 5.300e-02    |
| $n_{\text{inh}}$                                   |                     | 12           |
| $\tau_{\text{rise, GABA}}$ (ms)                    |                     | 1.000e+00    |
| $\tau_{\text{decay, GABA}}$ (ms)                   |                     | 1.000e+01    |
| $\bar{g}_{\text{GABA}}$ (nS)                       |                     | 1.300e-01    |
| $n_{\text{exc}}$                                   |                     | 12           |
| $\tau_{\text{rise, AMPA}}$ (ms)                    |                     | 2.000e-01    |
| $\tau_{\text{decay, AMPA}}$ (ms)                   |                     | 2.500e+00    |
| $\bar{g}_{\text{AMPA}}$ (nS)                       |                     | 1.000e-01    |
| $\tau_{\text{rise, NMDA}}$ (ms)                    |                     | 2.000e+00    |
| $\tau_{\text{decay, NMDA}}$ (ms)                   |                     | 5.000e+01    |
| $\bar{g}_{\text{NMDA}}$ (nS)                       |                     | 1.000e-01    |

$C_m$ : Specific membrane capacitance  
 $R_m$ : Specific membrane resistance  
 $R_a$ : Axial resistivity  
 $E_{\text{Na}}$ : Sodium reversal potential  
 $E_{\text{K}}$ : Potassium reversal potential  
 $E_{\text{leak}}$ : Passive (leak) reversal potential  
 AMPA: 2-amino-3-(3-hydroxy-5-methyl-isoxazol-4-yl)propanoic acid  
 $E_{\text{AMPA}}$ : AMPA-type glutamate receptor channel reversal potential  
 NMDA: *N*-Methyl-*D*-aspartate  
 $E_{\text{NMDA}}$ : NMDA-type glutamate receptor channel reversal potential

$E_h$ : Reversal potential of HCN channels  
 $\bar{g}_{\text{Na}}$ : Max. fast sodium conductance density  
 $\bar{g}_{\text{K, dR}}$ : Max. delayed rectifier potassium conductance density  
 $\bar{g}_{\text{K, A}}$ : Max. A-type potassium conductance density  
 $\bar{g}_{\text{K, M}}$ : Max. M-type potassium conductance density  
 $\bar{g}_{\text{h, fast}}$ : Max. fast HCN conductance density  
 $\bar{g}_{\text{h, slow}}$ : Max. slow HCN conductance density  
 $n_{\text{exc}}$ : Number of excitatory synapse clusters  
 $n_{\text{inh}}$ : Number of inhibitory synapse clusters
